# Supplementary material for: Maternally inherited piRNAs direct transient heterochromatin formation at active transposons during early Drosophila embryogenesis
Source: eLife journal article supplement (doi:10.7554/elife.68573), 2021-07-08
Supplement: supp [file elife_poa_e68573_Transparent_Reporting_File.pdf › elife_poa_e68573_Transparent_Reporting_File.pdf]

## eLife's transparent reporting form

We encourage authors to provide detailed information *within their submission* to facilitate the interpretation and replication of experiments. Authors can upload supporting documentation to indicate the use of appropriate reporting guidelines for health-related research (see [EQUATOR Network](#)), life science research (see the [BioSharing Information Resource](#)), or the [ARRIVE guidelines](#) for reporting work involving animal research. Where applicable, authors should refer to any relevant reporting standards documents in this form.

If you have any questions, please consult our Journal Policies and/or contact us: [editorial@elifesciences.org](mailto:editorial@elifesciences.org).

### Sample-size estimation

- You should state whether an appropriate sample size was computed when the study was being designed
- You should state the statistical method of sample size computation and any required assumptions
- If no explicit power analysis was used, you should describe how you decided what sample (replicate) size (number) to use

Please outline where this information can be found within the submission (e.g., sections or figure legends), or explain why this information doesn't apply to your submission:

Sample sizes are indicated in applicable figure legends as well as the methods section.

### Replicates

- You should report how often each experiment was performed
- You should include a definition of biological versus technical replication
- The data obtained should be provided and sufficient information should be provided to indicate the number of independent biological and/or technical replicates
- If you encountered any outliers, you should describe how these were handled
- Criteria for exclusion/inclusion of data should be clearly stated
- High-throughput sequence data should be uploaded before submission, with a private link for reviewers provided (these are available from both GEO and ArrayExpress)

Please outline where this information can be found within the submission (e.g., sections or figure legends), or explain why this information doesn't apply to your submission:

Biological replicates are indicated in figure legends. Sequencing and mass spectrometry data has been uploaded to appropriate archives. Sequencing data can be found at GEO, submission ID GSE160778 and can be accessed using `urclccqopredzqj` as token. Proteomics data can be found on the PRIDE Archive (accession number PXD022409) and accessed using the following login details: Username: `reviewer_pxd022409@ebi.ac.uk` Password: `fbwM7Ktj`

## Statistical reporting

- Statistical analysis methods should be described and justified
- Raw data should be presented in figures whenever informative to do so (typically when N per group is less than 10)
- For each experiment, you should identify the statistical tests used, exact values of N, definitions of center, methods of multiple test correction, and dispersion and precision measures (e.g., mean, median, SD, SEM, confidence intervals; and, for the major substantive results, a measure of effect size (e.g., Pearson's r, Cohen's d)
- Report exact p-values wherever possible alongside the summary statistics and 95% confidence intervals. These should be reported for all key questions and not only when the p-value is less than 0.05.

Please outline where this information can be found within the submission (e.g., sections or figure legends), or explain why this information doesn't apply to your submission:

Statistical tests are indicated in the figure legends as well as the "quantification and statistical analysis" section of the methods.

(For large

datasets, or papers with a very large number of statistical tests, you may upload a single table file with tests, Ns, etc., with reference to sections in the manuscript.)

## Group allocation

- Indicate how samples were allocated into experimental groups (in the case of clinical studies, please specify allocation to treatment method); if randomization was used, please also state if restricted randomization was applied
- Indicate if masking was used during group allocation, data collection and/or data analysis

Please outline where this information can be found within the submission (e.g., sections or figure legends), or explain why this information doesn't apply to your submission:

No experiment required group allocation.

## Additional data files ("source data")

- We encourage you to upload relevant additional data files, such as numerical data that are represented as a graph in a figure, or as a summary table
- Where provided, these should be in the most useful format, and they can be uploaded as "Source data" files linked to a main figure or table
- Include model definition files including the full list of parameters used
- Include code used for data analysis (e.g., R, MatLab)
- Avoid stating that data files are "available upon request"

Please indicate the figures or tables for which source data files have been provided:

**Figure supplement 1-source data 1:** Gene- and TE-mapping reads per million across embryogenesis RNA-seq time points for plots shown in Figure 1B-C, Figure 1-figure supplement 1A,B, Figure 1-figure supplement 2A,F, Figure 2A and Figure 2-figure supplement 1H,J.  
**Figure supplement 1-source data 2:** Signal intensity of genes and transposon ORFs in TMT-MS time-course experiment for plots shown in Figure 1-figure supplement 2A,C,D,F, Figure 2B and Figure 2-figure supplement 1I,K.
