# Supplementary material for: Maternally inherited piRNAs direct transient heterochromatin formation at active transposons during early Drosophila embryogenesis
Source: eLife. 2021 Jul 8;10:e68573. doi: 10.7554/eLife.68573 (PMC8352587; doi:10.7554/eLife.68573)
Supplement: Supplementary file 1. [file elife-68573-supp1.xlsx]

## Sheet: Sheet1
Oligo Name	DNA Sequence (5'-3')
act5c_qPCR_fwd	GCATCCACGAGACCACCTACAAC
act5c_qPCR_rev	CGGTGATCTCCTTCTGCATACGG
rp49_qPCR_fwd	GCATACAGGCCCAAGATCGTGAA
rp49_qPCR_rev	CGCACTCTGTTGTCGATACCCTT
gypsy_qpcr_fwd	GGTGTGGTCCTAAACTTCGGCTT
gypsy_qpcr_rev	TGAAAGTATCGATGGTGCGCTGT
burdock_qpcr_fwd	AGGGAAATATTTGGCCATCC
burdock_qpcr_rev	TTTTGGCCCTGTAAACCTTG
blood_qpcr_fwd	CATGTCTCGACCTAATGTCTGG
blood_qpcr_rev	TGGAAGGAGTTTGGTGCTAC
te297_qpcr_fwd	GAACTTCAGGGAGACACCATAC
te297_qpcr_rev	GGTTACCTTCCAGGTGTAGTT
mdg1_qpcr_fwd	TATACGAACACTCCACCACCCCA
mdg1_qpcr_rev	GGCTTTTCGGATTGGGAGTTGGA
heta_qpcr_fwd	ACACTCACCTAAACGCACC
heta_qpcr_rev	GCCGCACATATCCTTTTCATATC
roo_qpcr_fwd	CAGTCACTTGAGATCGTTCCC
roo_qpcr_rev	GTAAATAGTCCCCGCCTTATCG
oMF0413_roo_hcr_probe1	GCCCTTACTCCCAATTCCaaaaaGGGAACGATCTCAAGTGACTGACTCATGTAGTGTGCACTTAAATTACATGTT
oMF0414_roo_hcr_probe2	GCCCTTACTCCCAATTCCaaaaaCGGGCACATCTGCCTATCTTGAGCGGCGAGGACCTTATCTGTGGTCTCCCAC
oMF0415_roo_hcr_probe3	GCCCTTACTCCCAATTCCaaaaaTTAAAGTAAATGGCCTACGCAGAGGCCTACGTAAATAGTCCCCGCCTTATCG
oMF0416_roo_hcr_probe4	GCCCTTACTCCCAATTCCaaaaaGGGAAACTGCAGAGTCGATTAAAGGCTCGATTGACCAAATGTAAAATCCCAA
oMF0417_roo_hcr_probe5	GCCCTTACTCCCAATTCCaaaaaTTTTTGCTACCTTTAGCTGTAAGATGCTTAAAGGAGCTGGCCTTTCTCTGAG
oMF0418_roo_hcr_probe6	GCCCTTACTCCCAATTCCaaaaaTATGGCCTCAAGCACGCCTTACCACAATTTATAATGGTACACAAAGCAACCT
oMF0419_roo_hcr_probe7	GCCCTTACTCCCAATTCCaaaaaTGCTTCTGCTGCTGGTAGAGGCTCCTTTGAATTTGACTTCCTTCTCTTCTTT
oMF0420_roo_hcr_probe8	GCCCTTACTCCCAATTCCaaaaaATTCTTGTTTTGACTTAGCTGATGTCGTTGTTGTTGCTGCTGCTGTTGCTGC
oMF0421_roo_hcr_probe9	GCCCTTACTCCCAATTCCaaaaaGGAGGGTTTGATTTAGGGACAGTGTTTGATTTAGGGAAAGTGTTTTCTACCG
oMF0422_roo_hcr_probe10	GCCCTTACTCCCAATTCCaaaaaTCACCAAAGAAGGTGGGAATCTGTATTTTAGGCAGGGTTGGTAACTCCTCCG
